# Supplementary material for: Espin overexpression causes stereocilia defects and provides an anti‐capping effect on actin polymerization
Source: PubMed Central journal article supplement — Cytoskeleton (Hoboken). 2022 Jul 30;79(6-8):64–74. doi: 10.1002/cm.21719 (PMC9796729; doi:10.1002/cm.21719), 2022-07-30

Figure S1

A.

ABM (116 residues)

-VEALIP<sup>T</sup>LDEQGRPIPEW<sub>1</sub>KRQVMVRKLQOKMQEEEEQRRKEEEEEEAR-  
 LASLPAW<sub>2</sub>RRDILRKKLEEEEREQKRKEEERQKLEEIQR<sup>A</sup>KEQSEKLR-  
 TLGYDEAKLAPW<sub>3</sub>QRQVILKKGEIPK

B.

F-actin Binding Assay

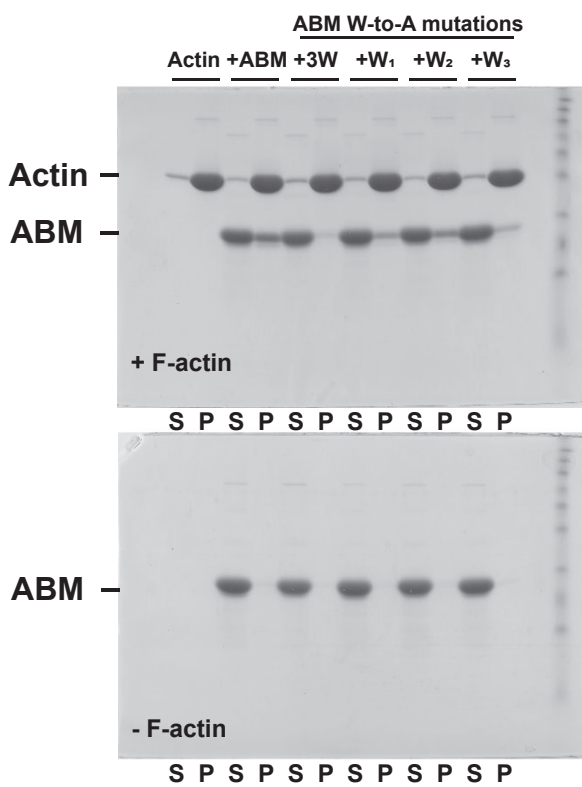

C.

F-actin Bundling Assay

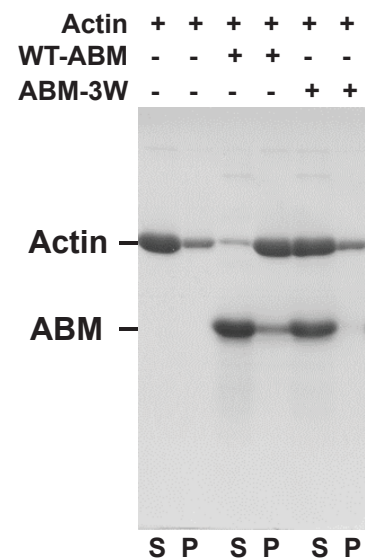

D.

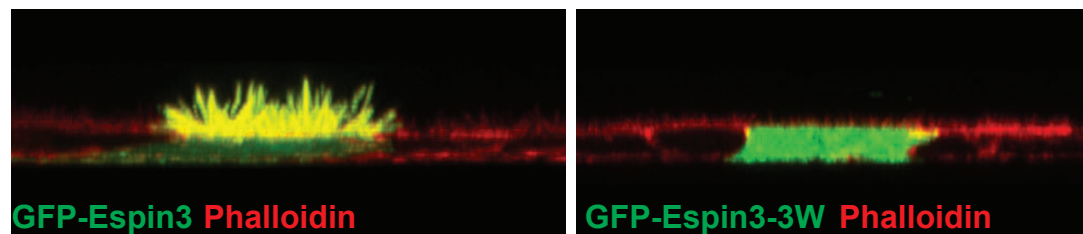

Supplement: CM-79-64-s001.pdf [file CM-79-64-s001.pdf]
